# Supplementary material for: Characterization of the thermolysis products of Nafion membrane: A potential source of perfluorinated compounds in the environment
Source: PubMed Central journal article supplement (PMC5386195; doi:10.1038/srep09859), 2015-05-07
Supplement: srep09859-s1.pdf [file srep09859-s1.pdf]

## **Supplementary Information**

### **Characterization of the thermolysis products of Nafion membrane: A potential source of perfluorinated compounds in the environment**

Mingbao Feng, Ruijuan Qu, Zhongbo Wei, Liansheng Wang, Ping Sun<sup>\*</sup>, Zunyao Wang<sup>\*</sup>

State Key Laboratory of Pollution Control and Resources Reuse, School of the Environment, Nanjing University, Nanjing 210023, P. R. China

#### **\* Corresponding authors:**

Dr. Zunyao Wang, Fax: +86-25-89680358; E-mail: [wangzy@nju.edu.cn](mailto:wangzy@nju.edu.cn).

Dr. Ping Sun, Fax: +86-25-83686580; E-mail: [sunping@nju.edu.cn](mailto:sunping@nju.edu.cn).

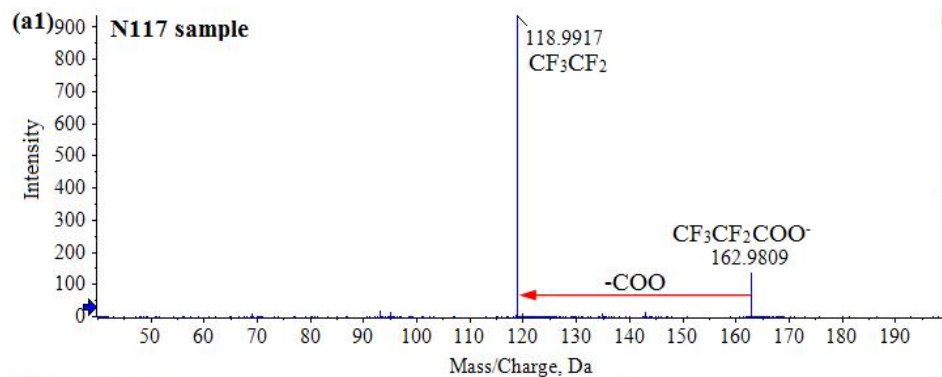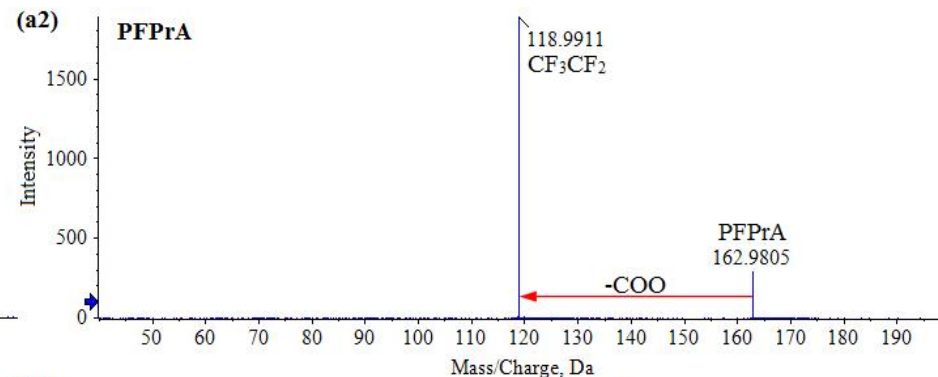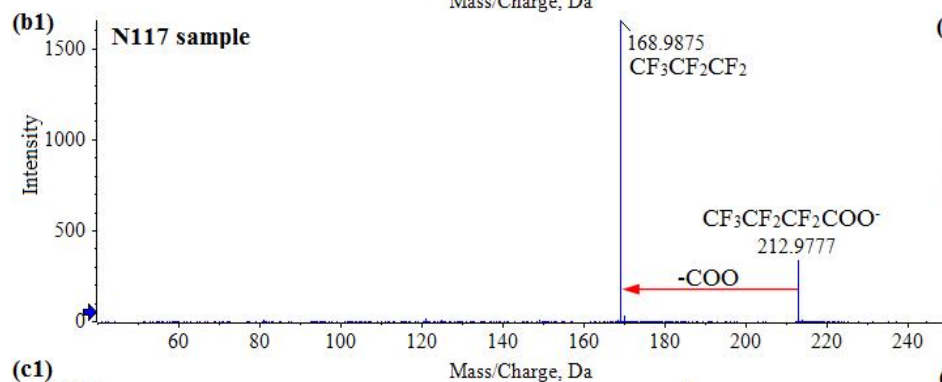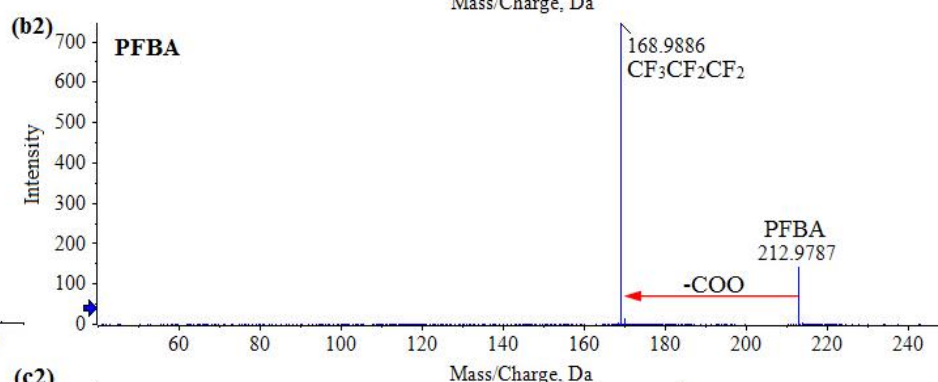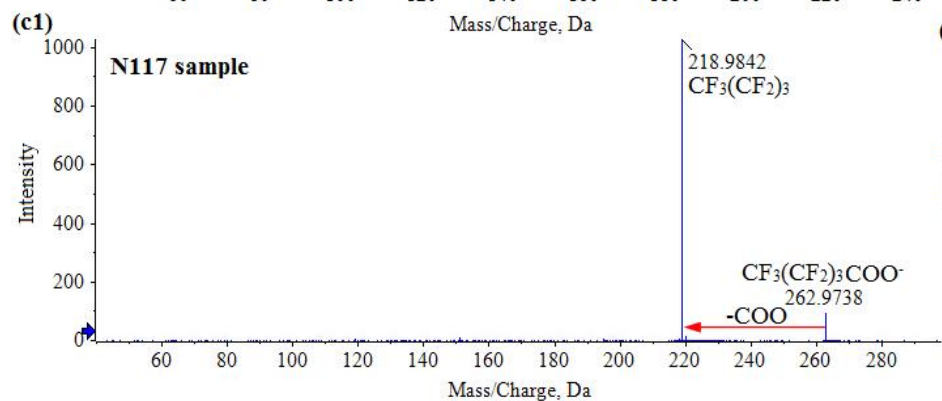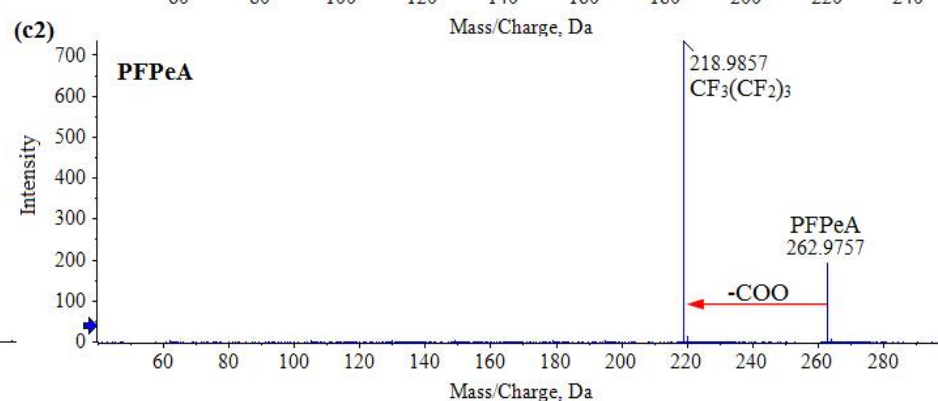

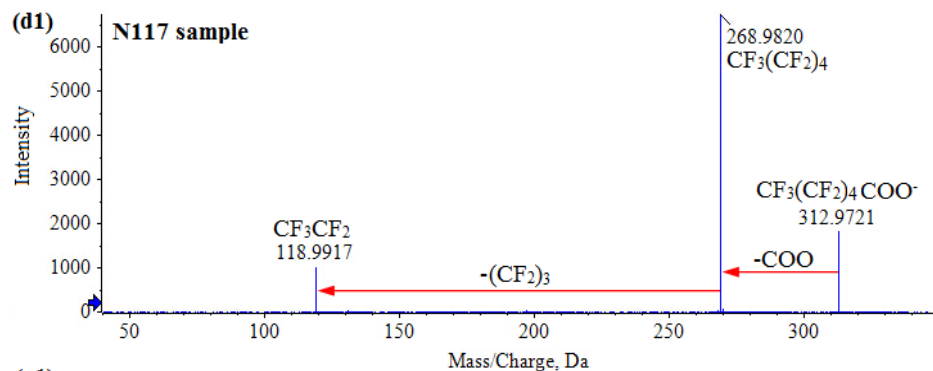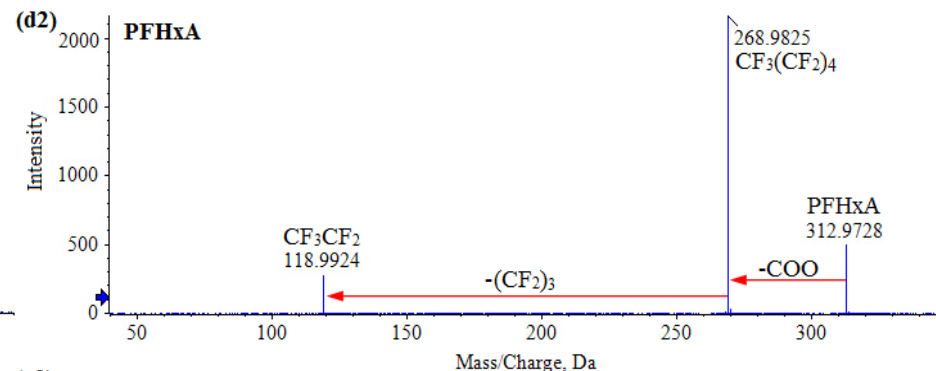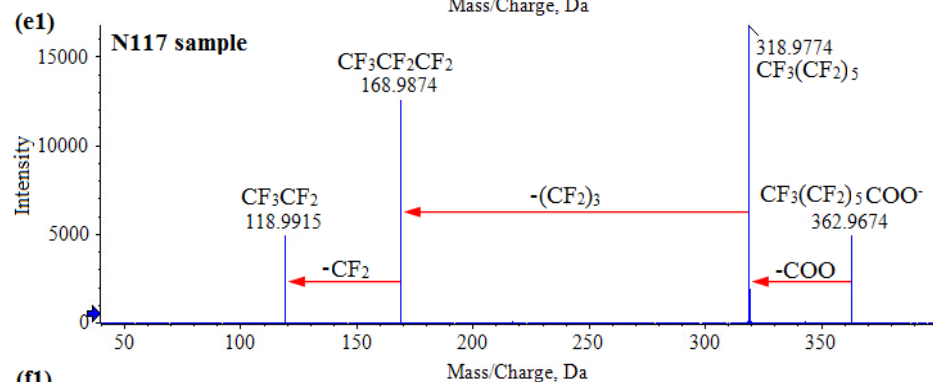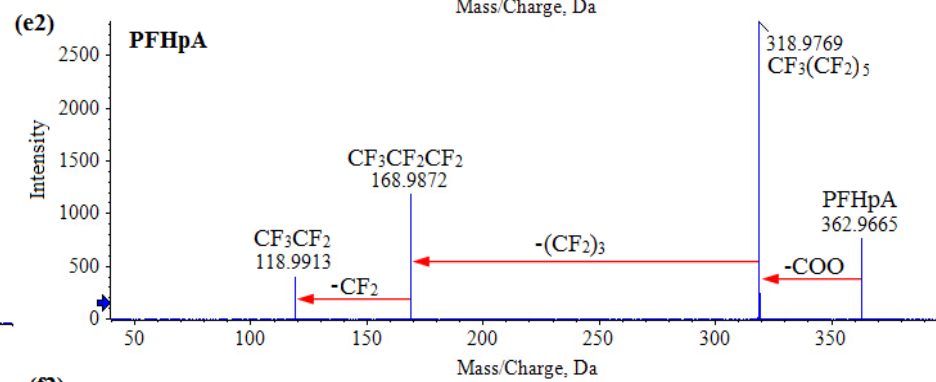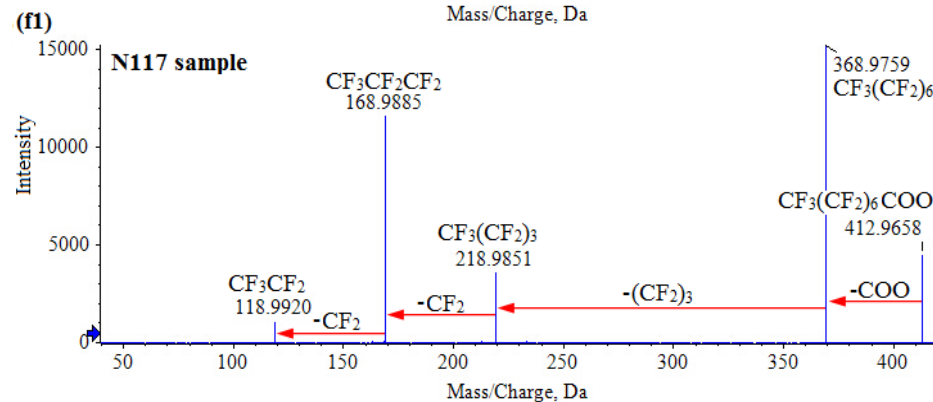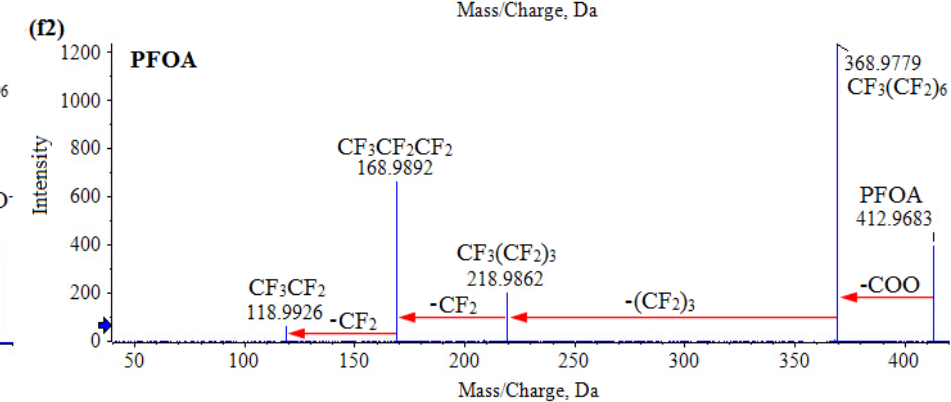

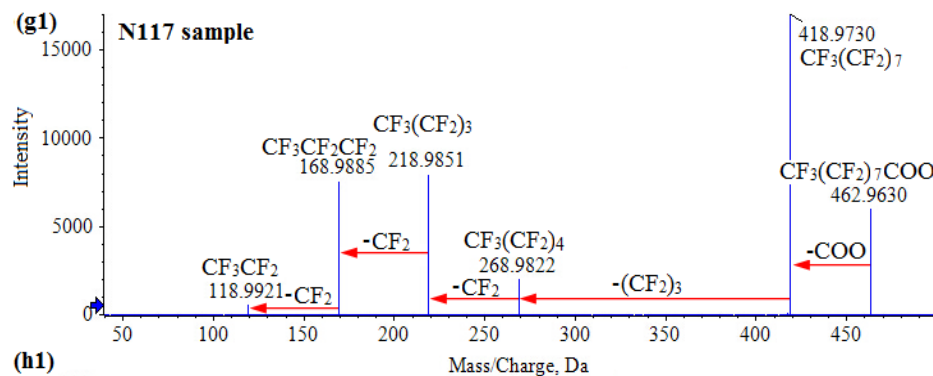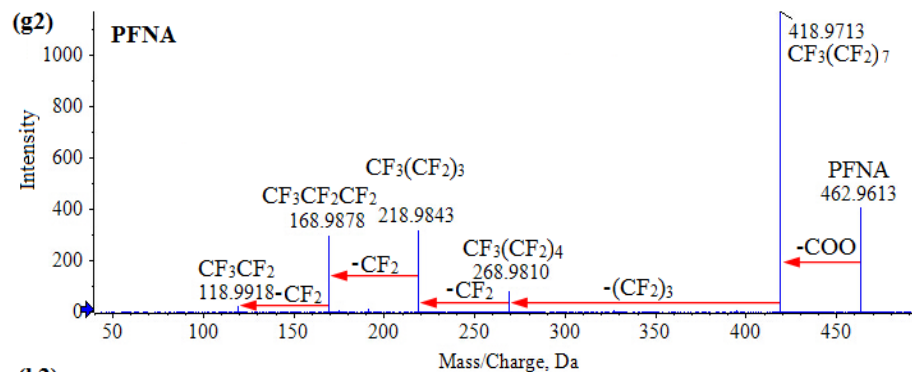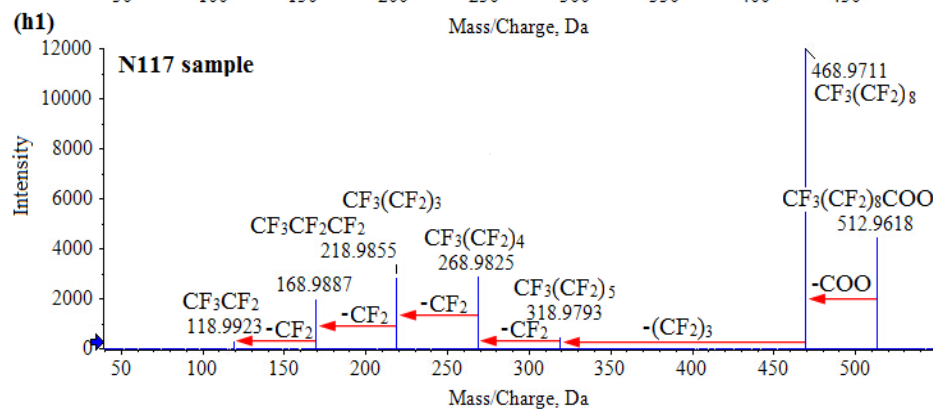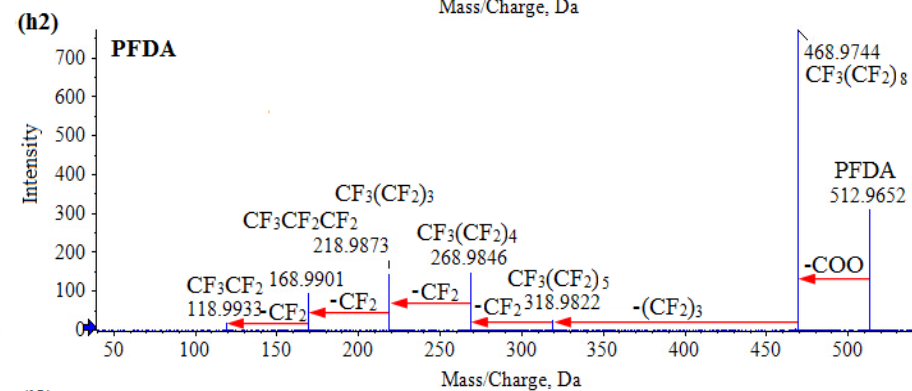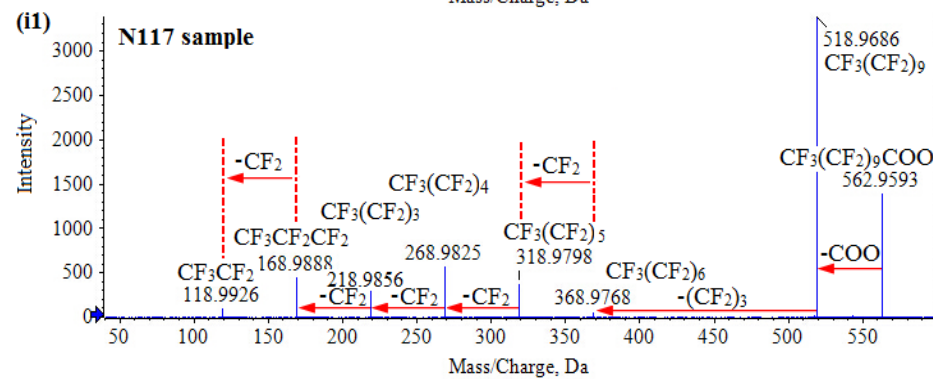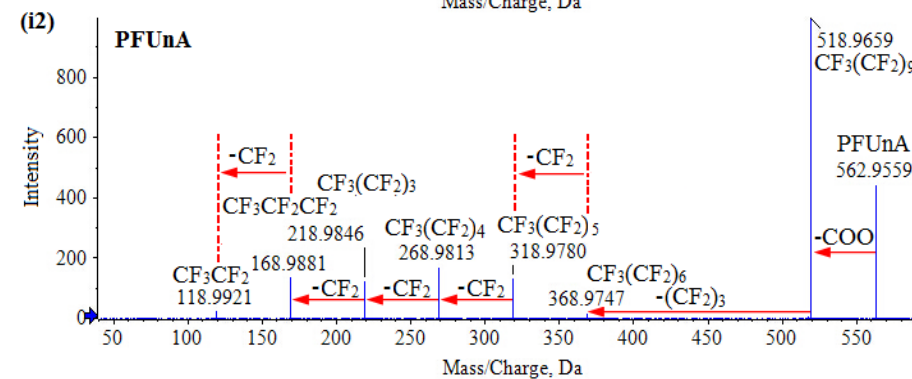

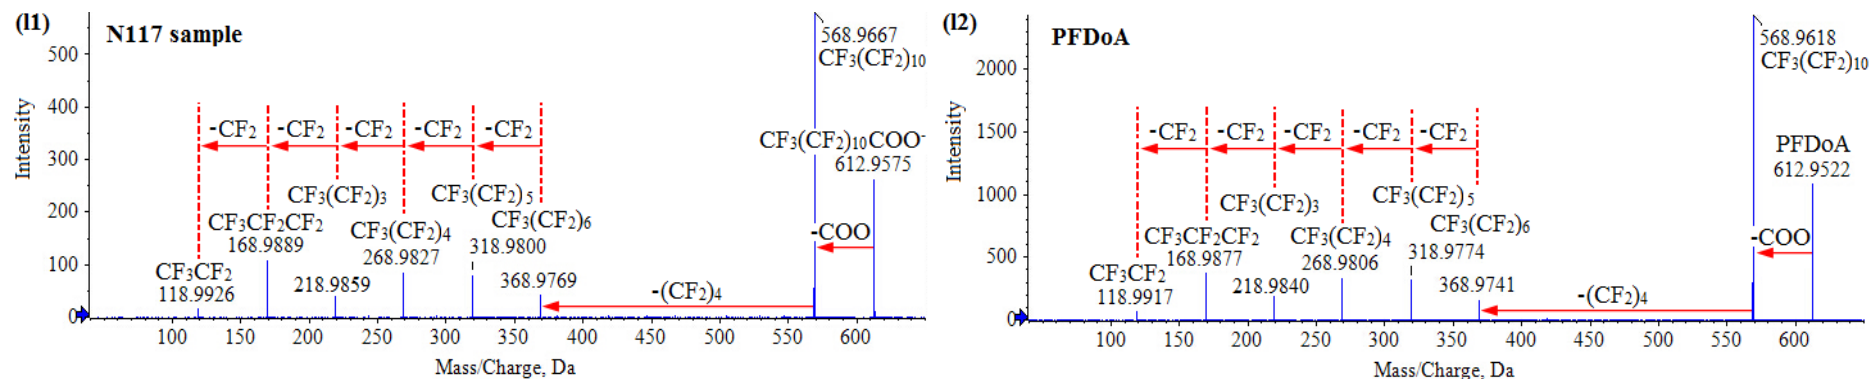

**Supplementary Figure S1.** Q-TOF MS/MS spectra of product ion scan of selected  $m/z$  values (a1, 162.9809; b1, 212.9777; c1, 262.9738; d1, 312.9721; e1, 362.9674; f1, 412.9658; g1, 462.9630; h1, 512.9618; i1, 562.9593; 11, 612.9575) of N117 thermolysis products, and the validations by the corresponding standard solutions of PFCAs (a2, PFPrA; b2, PFBA; c2, PFPeA; d2, PFHxA; e2, PFHpA; f2, PFOA; g2, PFNA; h2, PFDA; i2, PFUnA; 12, PFD0A; 50  $\mu\text{g L}^{-1}$  for each compound) and the proposed structures for their major fragments.

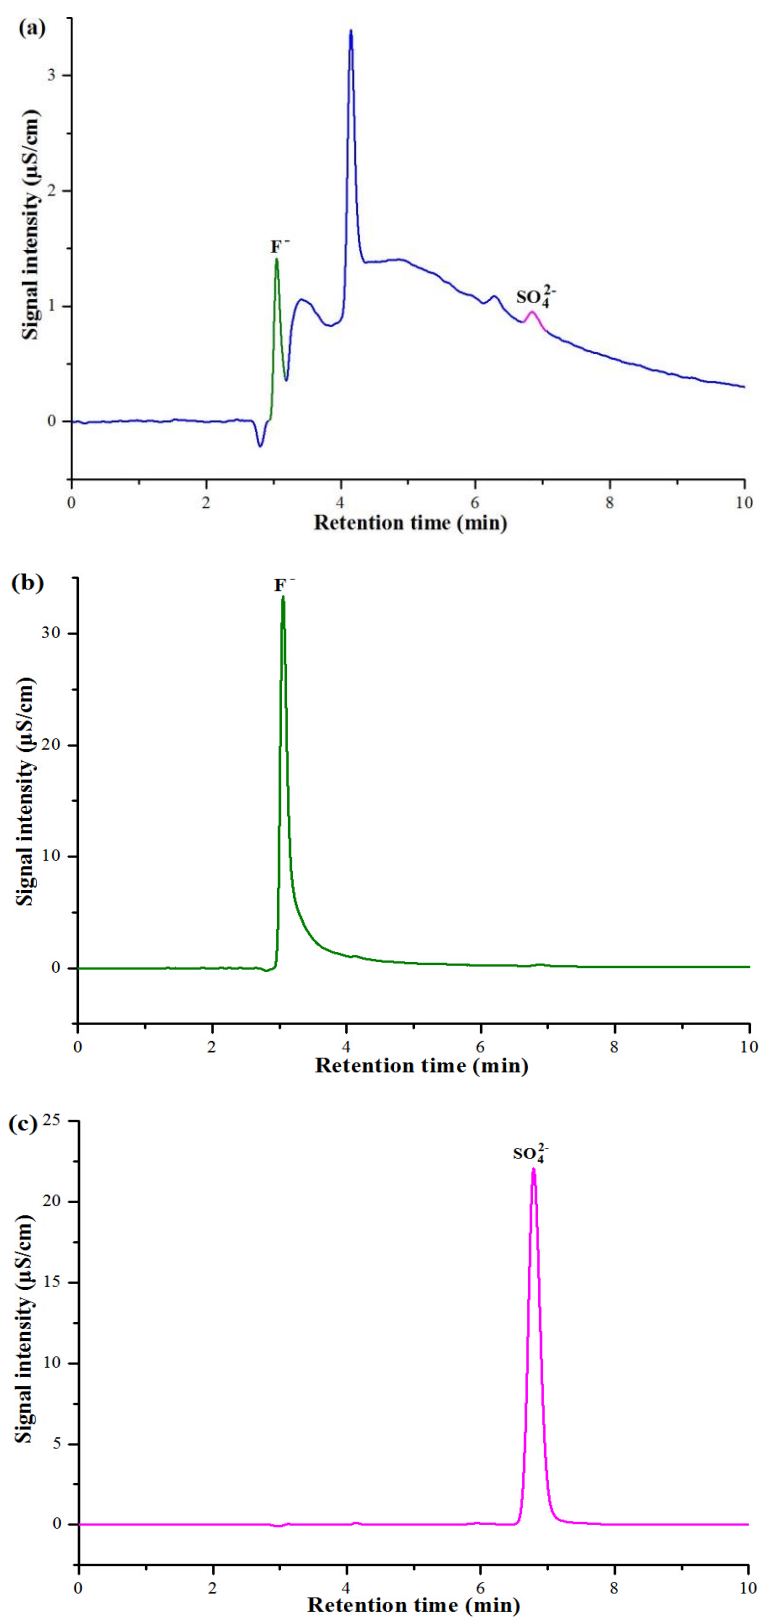

**Supplementary Figure S2.** The observed ion chromatogram (IC) of NaOH absorption solution (a), which indicates the formation of  $\text{F}^-$  and  $\text{SO}_4^{2-}$  ions during N117 thermolysis, NaF solution (20 mg  $\text{L}^{-1}$ ; b) and  $\text{Na}_2\text{SO}_4$  solution (20 mg  $\text{L}^{-1}$ ; c).

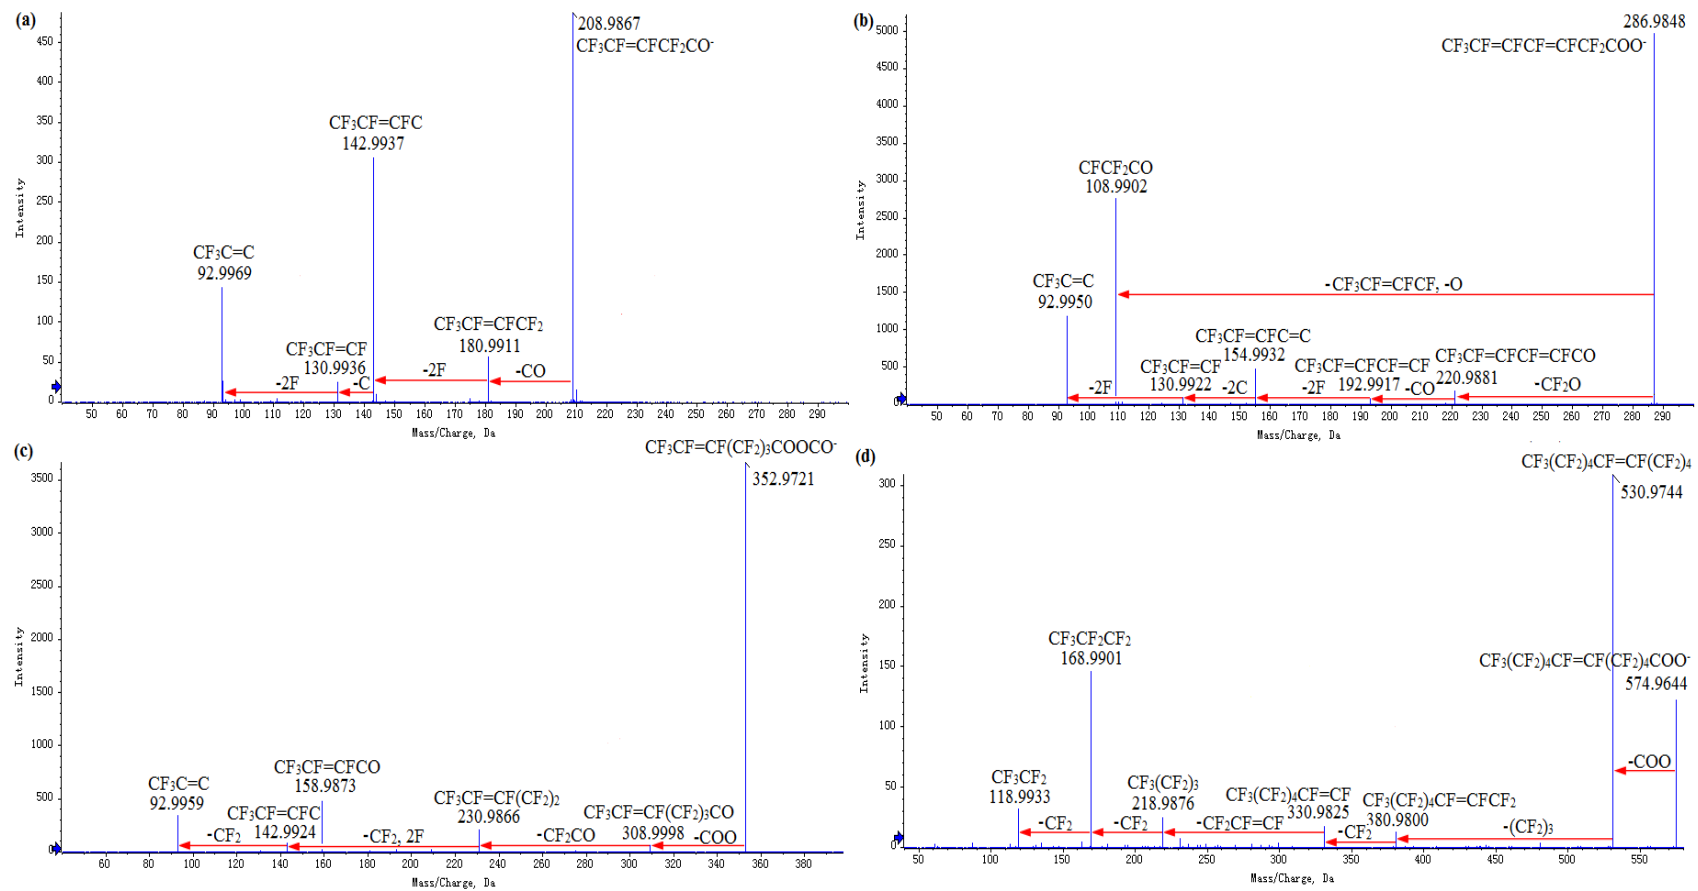

**Supplementary Figure S3.** Q-TOF MS/MS spectra of product ion scan of several representative  $m/z$  values of PFC analogues (a, 208.9867; b, 286.9848; c, 352.9721; d, 574.9644), and the proposed structures for their major fragments.

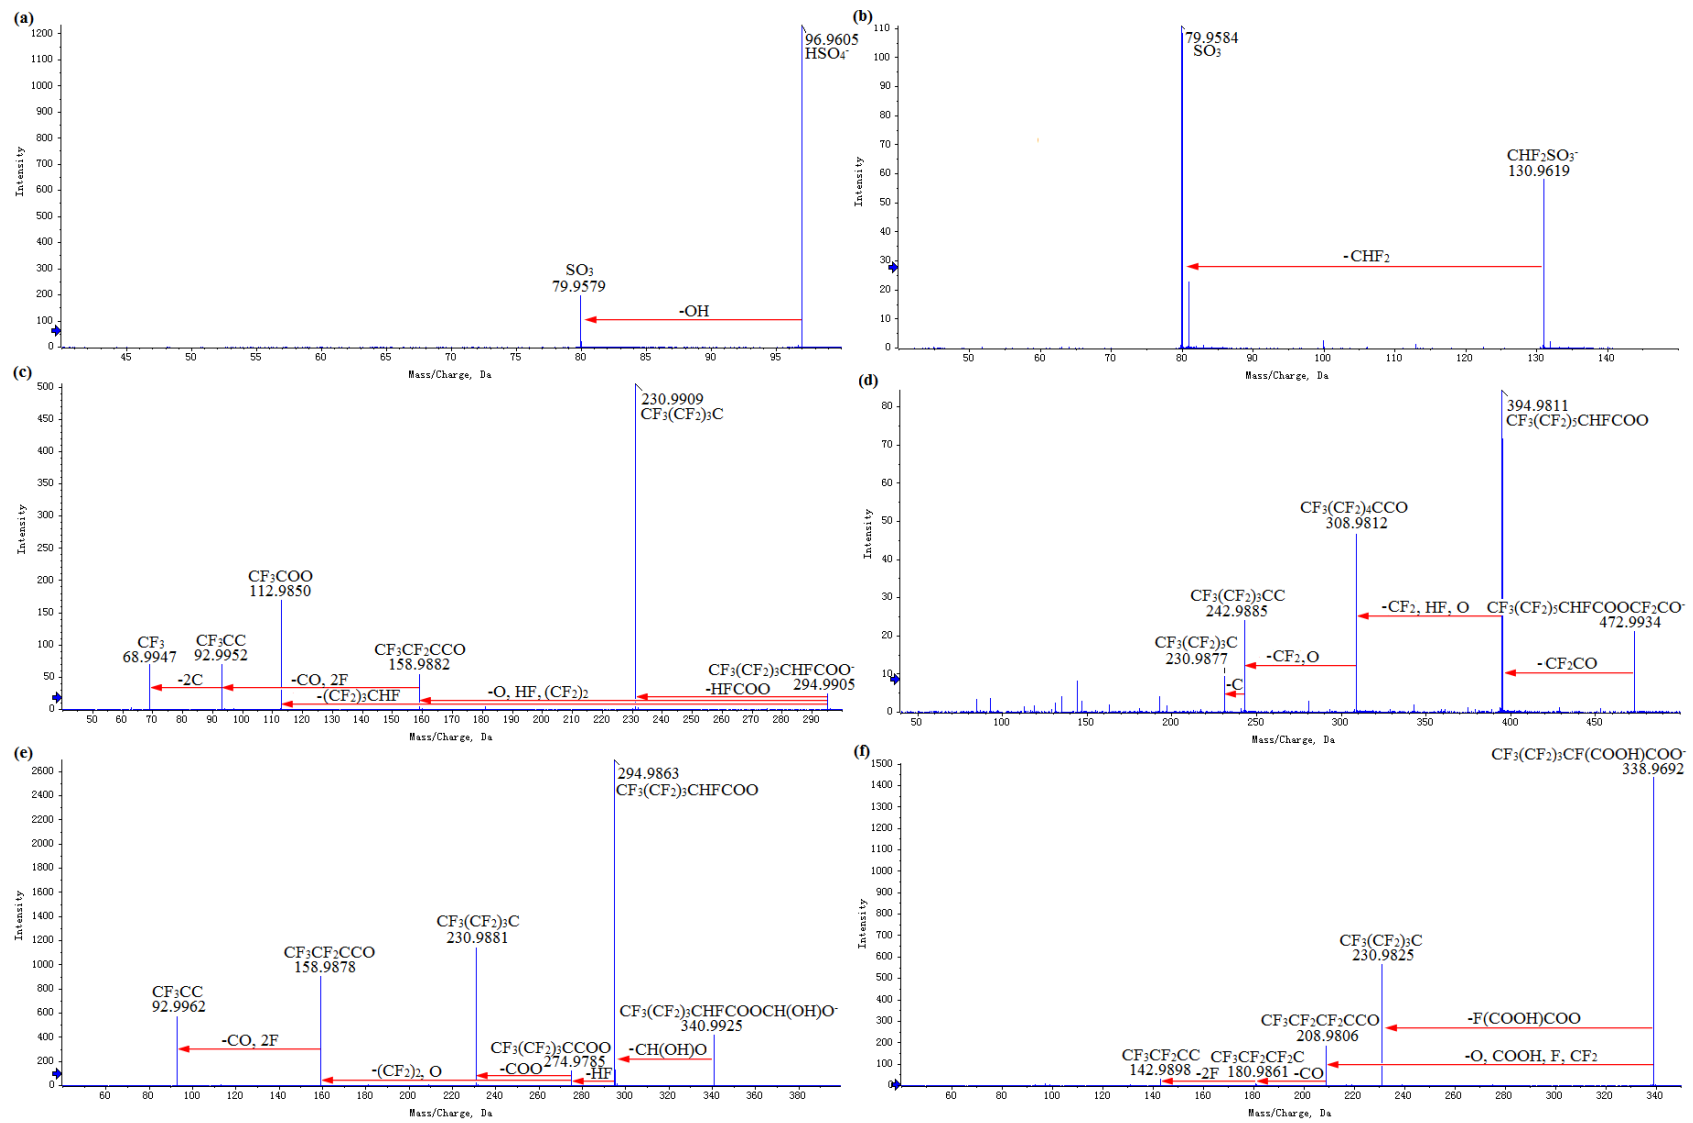



**Supplementary Figure S4.** Q-TOF MS/MS spectra of product ion scan of selected  $m/z$  values of several other products (a, 96.9605; b, 130.9619; c, 294.9905; d, 472.9934; e, 340.9925; and f, 338.9692), and the proposed structures for their major fragments.

**Supplementary Table S1.** The proposed chemical structures of several other  $m/z$  values observed in this study, and their possible cleavage sites (highlighted in red).

| $m/z$ values    | Molecular formula   | Proposed chemical structures |
|-----------------|---------------------|------------------------------|
| <b>208.9867</b> | $C_5F_7O^-$         |                              |
| 180.9911        | $C_4F_7$            |                              |
| 142.9937        | $C_4F_5$            |                              |
| 130.9936        | $C_3F_5$            |                              |
| <b>352.9721</b> | $C_8F_{11}O_3^-$    |                              |
| 308.9998        | $C_7F_{11}O$        |                              |
| 230.9866        | $C_5F_9$            |                              |
| 142.9924        | $C_4F_5$            |                              |
| <b>574.9644</b> | $C_{12}F_{21}O_2^-$ |                              |
| 530.9744        | $C_{11}F_{21}$      |                              |
| 380.9800        | $C_8F_{15}$         |                              |
| 330.9825        | $C_7F_{13}$         |                              |

**Supplementary Table S2.** Chemical names, formula and molecular structures (linear isomers) of PFCA analogues ( $C_nF_{2n+1}COOH$ ,  $n = 1-11$ ) of interest in this study.

| Chemical name           | Formula         | Abbreviation | Molar weight ( $g\ mol^{-1}$ ) | Chemical structure                                                                    |
|-------------------------|-----------------|--------------|--------------------------------|---------------------------------------------------------------------------------------|
| Trifluoroacetic acid    | $CF_3COOH$      | TFA          | 113.99                         | 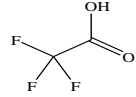   |
| Perfluoropropanoic acid | $C_2F_5COOH$    | PFPrA        | 163.99                         |    |
| Perfluorobutanoic acid  | $C_3F_7COOH$    | PFBA         | 213.99                         |    |
| Perfluoropentanoic acid | $C_4F_9COOH$    | PFPeA        | 263.98                         |    |
| Perfluorohexanoic acid  | $C_5F_{11}COOH$ | PFHxA        | 313.98                         |  |
| Perfluoroheptanoic acid | $C_6F_{13}COOH$ | PFHpA        | 363.98                         |  |

|                          |                    |                    |        |                                                                                     |
|--------------------------|--------------------|--------------------|--------|-------------------------------------------------------------------------------------|
| Perfluorooctanoic acid   | $C_7F_{15}COOH$    | PFOA               | 413.97 | 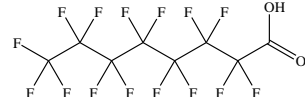 |
| Perfluorononanoic acid   | $C_8F_{17}COOH$    | PFNA               | 463.97 |  |
| Perfluorodecanoic acid   | $C_9F_{19}COOH$    | PFDA               | 513.97 |  |
| Perfluoroundecanoic acid | $C_{10}F_{21}COOH$ | PFUnA              | 563.96 |  |
| Perfluorododecanoic acid | $C_{11}F_{23}COOH$ | PFD <sub>o</sub> A | 613.96 |  |

**Supplementary Table S3.** The thermal degradation products of perfluorosulfonic acid copolymer <sup>a</sup>.

| Compound           | Evolution Temperature, °C | mg g <sup>-1</sup> Sample |
|--------------------|---------------------------|---------------------------|
| SO <sub>2</sub>    | 280                       | 15                        |
| CO <sub>2</sub>    | 300                       | 30                        |
| HF                 | 400                       | - <sup>b</sup>            |
| CO                 | 400                       | 3                         |
| R <sub>f</sub> COF | 400                       | 10 <sup>c</sup>           |
| COF <sub>2</sub>   | 400                       | 3                         |
| COS                | 400                       | Trace                     |
| R <sub>f</sub> OH  | 400                       | Trace                     |

<sup>a</sup> Cited from DuPont Fuel Cells<sup>1</sup>.

<sup>b</sup> Significant level but concentration could not be determined because HF reacts with and absorbs on cell walls.

<sup>c</sup> Mixture of products.

## Supplementary text

**Chemical degradation mechanism of Nafion in fuel cells.** Currently, the unzipping reaction has been termed as a commonly accepted chemical degradation mechanism. It is generally initiated by the attack of some radicals on the H-containing end groups, causing the release of HF and CO<sub>2</sub> and the formation of new carboxylate groups at the chain ends, and finally resulting in the membrane degradation<sup>2,3</sup>. The proposed reactions between OH<sup>•</sup> and end groups -CF<sub>2</sub>COOH are shown below (eq 1-3)<sup>2,4</sup>.

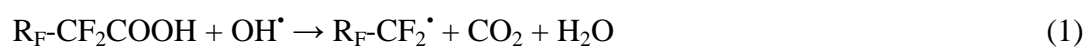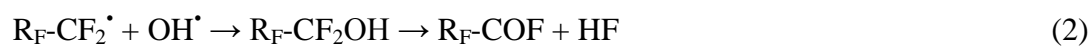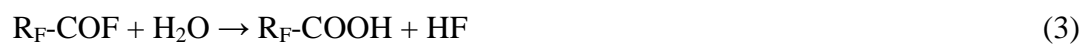

## Supplementary References

1. DuPont Fuel Cells. Safe Handling and Use of Perfluorosulfonic Acid Products (Technical Information). (2009).
2. Wu, J. F. *et al.* A review of PEM fuel cell durability: Degradation mechanisms and mitigation strategies. *J. Power Sources* **184**, 104-119 (2008).
3. Danilczuk, M., Lancucki, L., Schlick, S., Hamrock, S. J. & Haugen, G. M. In-depth profiling of degradation processes in a fuel cell: 2D spectral-spatial FTIR spectra of Nafion membranes. *ACS Macro Lett.* **1**, 280-285 (2012).
4. Curtin, D. E., Lousenberg, R. D., Henry, T. J., Tangeman, P. C. & Tisack, M. E. Advanced materials for improved PEMFC performance and life. *J. Power Sources* **131**, 41-48 (2004).
